# Supplementary material for: Facile synthesis of telechelic poly(phenylene sulfide)s by means of electron-deficient aromatic sulfonium electrophiles
Source: Royal Society of Chemistry journal article supplement (doi:10.1039/d3ra06262g), 2023-01-01
Supplement: d3ra06262g1.pdf [file d3ra06262g1.pdf]

## Electronic Supplementary Information (ESI)

for

# Facile Synthesis of Telechelic Poly(phenylene sulfide)s by Means of Electron-deficient Aromatic Sulfonium Electrophiles

*Seigo Watanabe, Hiromichi Nishio, Kenichi Oyaizu\**

*Department of Applied Chemistry and Research Institute for Science and Engineering,  
Waseda University, Tokyo 169-8555, Japan*

\*Email: oyaizu@waseda.jp

## 1. Additional procedures and related information

### 1.1. Measurements

<sup>1</sup>H NMR spectra (500 MHz) were recorded by JEOL JNM-ECX500. Chemical shifts were calibrated using tetramethylsilane as an internal standard. IR spectroscopy was conducted by JASCO FT/IR-6100. Size exclusion chromatography (SEC) was performed with SHIMADZU LC-20AD/CBM-20A using TOSOH TSKgel SuperHM-N column with SHIMADZU SPD-M20A UV detector (wavelength: 254 nm) (eluent: chloroform, flow rate: 0.3 mL min<sup>-1</sup>, molecular weights were calibrated by polystyrene standards). Diffusion-ordered spectroscopy (DOSY) NMR spectra (600 MHz) were recorded by Bruker AVANCE 600 NEO (pulse sequence: ledbpgp2s). Cyclic voltammetry (CV) was conducted by BAS ALS 660D with a Pt wire, a Pt electrode ( $\phi$ : 1.6 mm), and an Ag/AgCl electrode as a counter, a working, and a reference electrode, respectively, whose potential was corrected by ferrocene/ferrocenium redox couple ( $E_{1/2} = 0.45$  V vs Ag/AgCl). Differential scanning calorimetry (DSC) was performed using TA Instruments Q200 (Scanning rate: 20 °C min<sup>-1</sup>).

### 1.2. Oxidation of Cl-DPS with DDQ and TFA

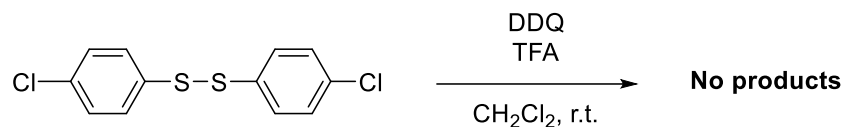

**Scheme S1**

In a 10 mL flask, **Cl-DPS** (0.82 g, 2.9 mmol) was dissolved in dichloromethane (6 mL) and DDQ (0.623 g, 2.7 mmol) and TFA (383  $\mu$ L, 5 mmol) were added and stirred. Although the color of the solution turned deep green after starting the reaction (i.e., charge-transfer complexation of **Cl-DPS** and DDQ), no products were obtained 15 hours after the reaction owing to the presence of *p*-substituted units as well as the electron-withdrawing properties of chlorine groups that prevented electrophilic substitution reaction.

### 1.3. Reduction of Cl-Terminated PMPS for end structure detection

Disulfide-reduced Cl-terminated telechelic **PMPS (Red-Cl-PMPS)** was prepared with the procedure based on our previous report<sup>1</sup> with several modifications (Scheme 2 in the main text). In a two-necked 50 mL flask, **Cl-PMPS** (0.16 g) was dissolved in THF (5.4 mL). After adding sodium borohydride (0.15 g), methanol (0.6 mL) was added and stirred at 70 °C under reflux for 15 hours. After the reaction, the solution was precipitated in methanol containing 5vol% hydrochloric acid (200 mL), and the precipitate was collected by filtration, was washed with methanol and water, and was dried in vacuo to obtain **Red-Cl-PMPS** (0.15 g, Yield: 92%).

#### 1.4. Determination procedure of end-functionalization degree

In this study, the degree of end-functionalization degree was determined as follows. First,  $M_n$  was calculated by both  $^1\text{H}$  NMR (comparison of peak integrals for aromatic and methyl protons) and SEC in chloroform. As  $^1\text{H}$  NMR can detect both proton/chlorine-terminated end groups including their numbers although SEC couldn't distinguish them, end-functionality was finally determined as equation (1) shown below.

$$\text{Degree of end functionalization} = \frac{M_n(\text{SEC})}{M_n(\text{NMR})} \quad \dots (1)$$

The degree of end-functionalization for **V-PMPS'** was also determined with a similar procedure (For **V-PMPS'**,  $M_n$  (NMR) was determined by comparing the integrals of vinyl and methyl protons).

#### 1.5. Post-functionalization of Br-PMPS by Suzuki-Miyaura cross-coupling reaction

The reaction has been described in the upper part of Scheme 3 in the main text. To a 30 mL flask, **Br-PMPS** (Run 3, Table 2) (0.16 g, 40  $\mu\text{mol}$  of Br), toluene (16 mL),  $\text{Pd}(\text{PPh}_3)_4$  (46 mg, 40  $\mu\text{mol}$ ), cesium carbonate (37 mg, 112  $\mu\text{mol}$ ), 4-phenylboronic acid (15 mg, 100  $\mu\text{mol}$ ), and water (0.16 mL) were added stirred at 60  $^\circ\text{C}$  for 24 hours. The solution was precipitated in methanol containing 5vol% hydrochloric acid (300 mL), and the precipitation was collected (filtration), was washed with methanol and water, and was dried in vacuo to obtain **V-PMPS** as a brownish powder (69 mg, Yield: 42%,  $M_n = 7.4 \times 10^3$ ,  $M_w/M_n = 2.2$ ).

## 2. Additional figures and tables

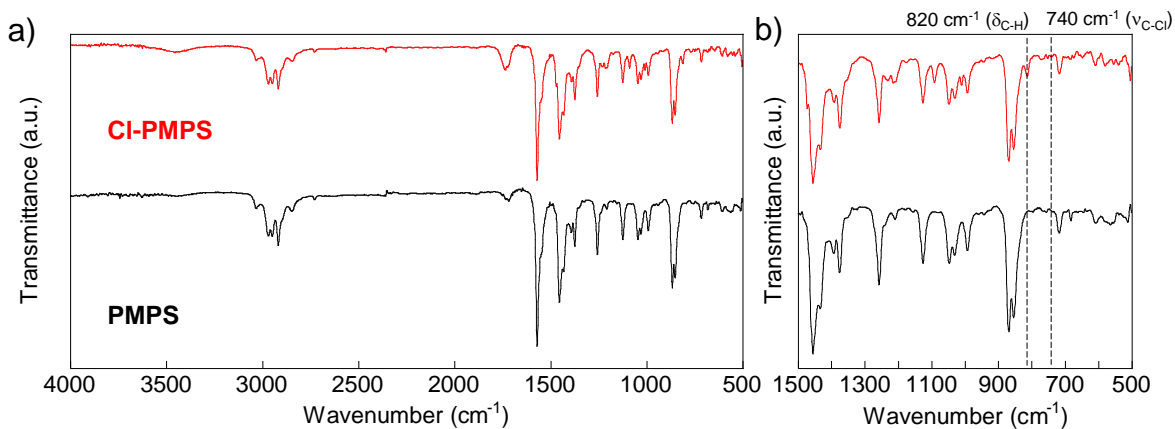

**Fig. S1** IR spectra of CI-PMPS and PMPS: (a) Overall (4000-500 cm<sup>-1</sup>) and (b) expanded (1500-500 cm<sup>-1</sup>) spectra.

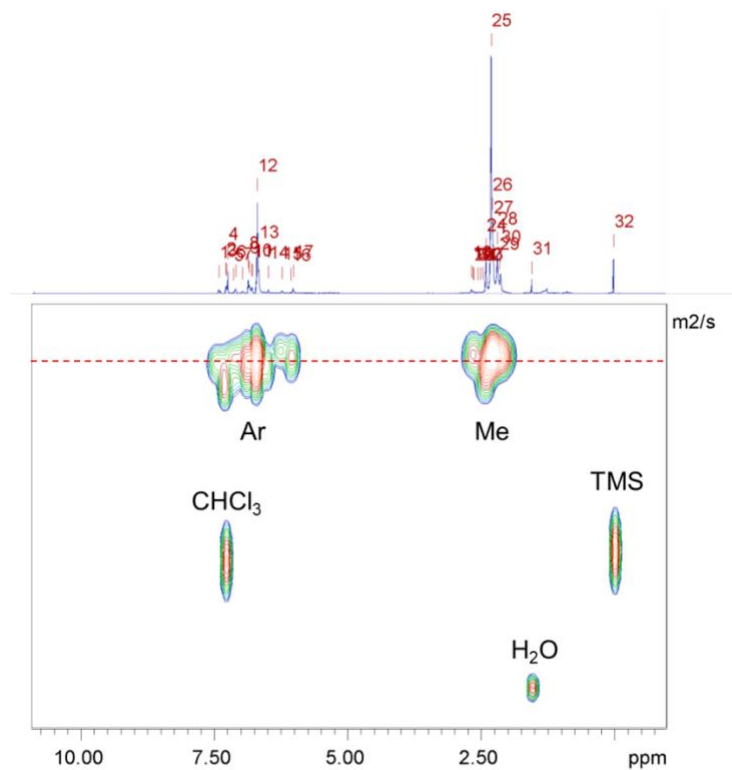

**Fig. S2** DOSY-NMR spectrum of CI-PMPS in chloroform-*d*.

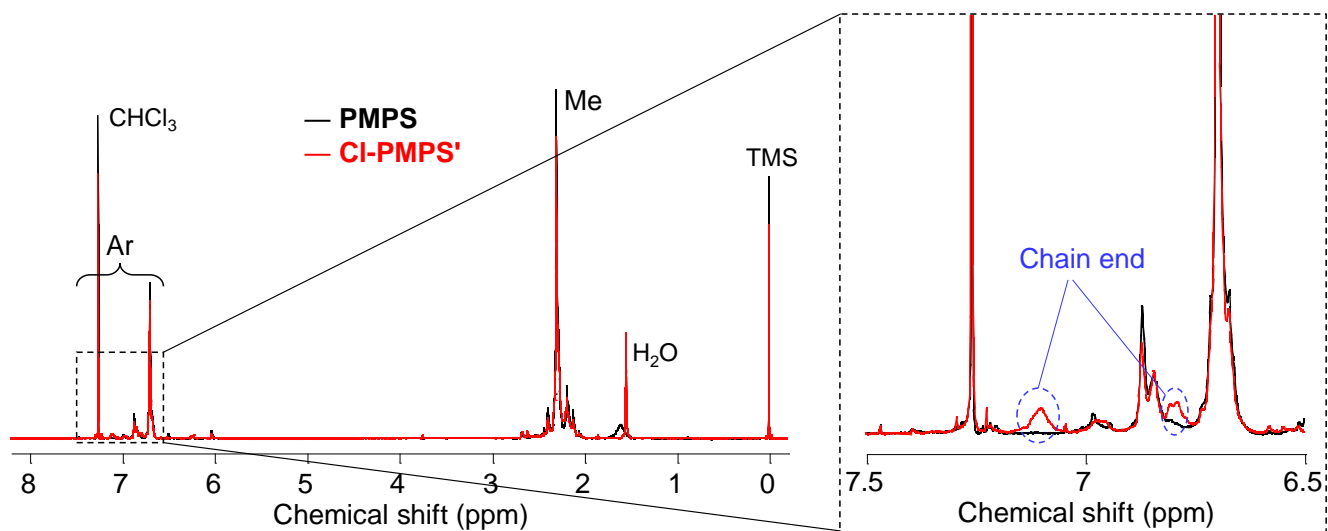

**Fig. S3** Overall (left) and expanded (right)  $^1\text{H}$  NMR spectra of **PMPS** and **Cl-PMPS'** in chloroform-*d*.

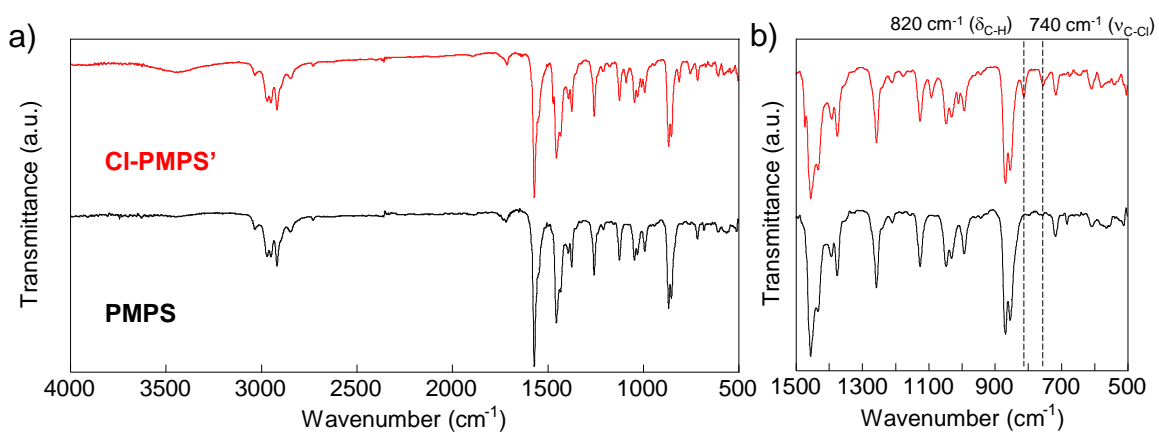

**Fig. S4** IR spectra of **PMPS** and **Cl-PMPS'**: (a) Overall ( $4000\text{-}500\text{ cm}^{-1}$ ) and (b) expanded ( $1500\text{-}500\text{ cm}^{-1}$ ) spectra.

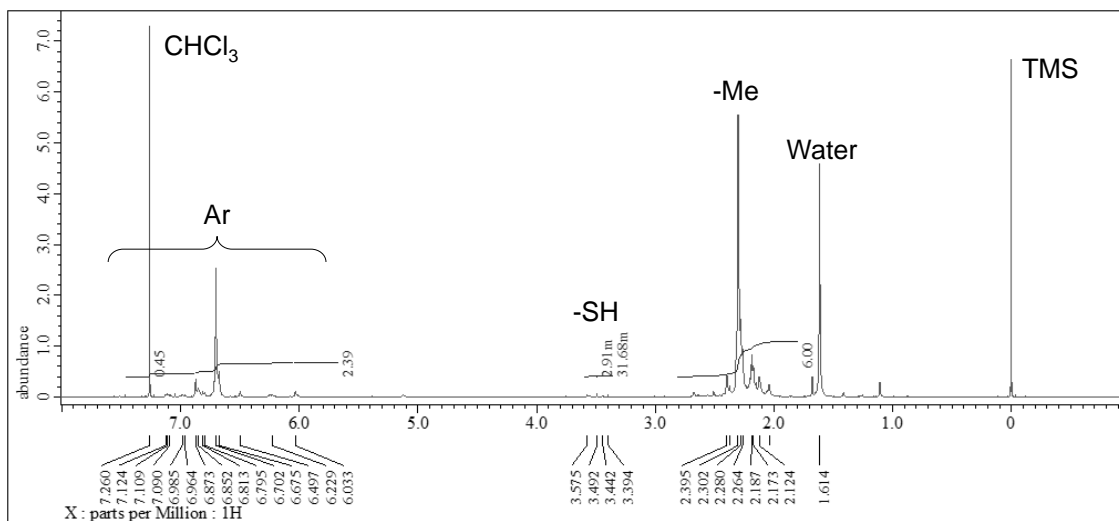

**Fig. S5**  $^1\text{H}$  NMR spectrum of Red-CI-PMPS in chloroform-*d*.

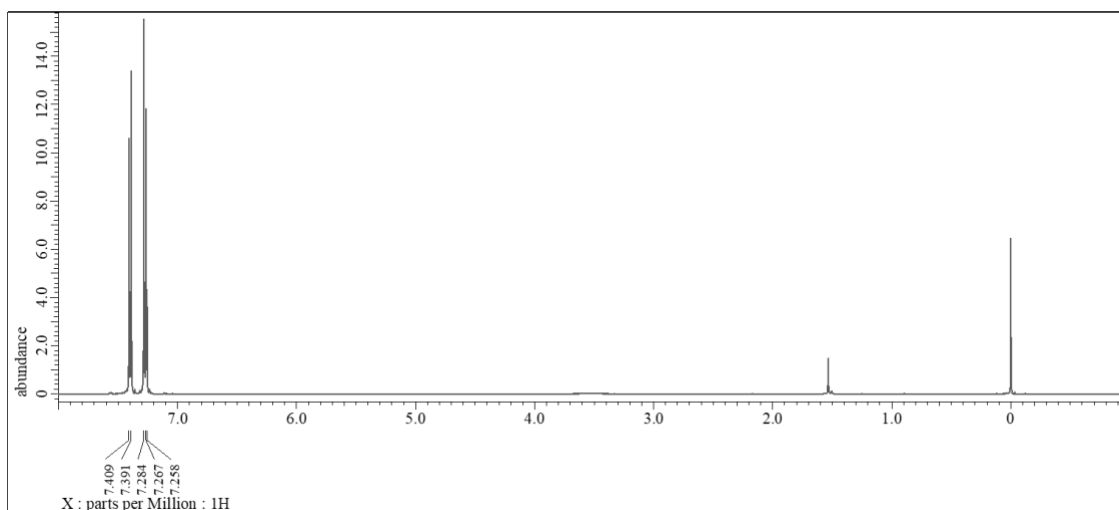

**Fig. S6**  $^1\text{H}$  NMR spectrum of CI-DPS in chloroform-*d*.

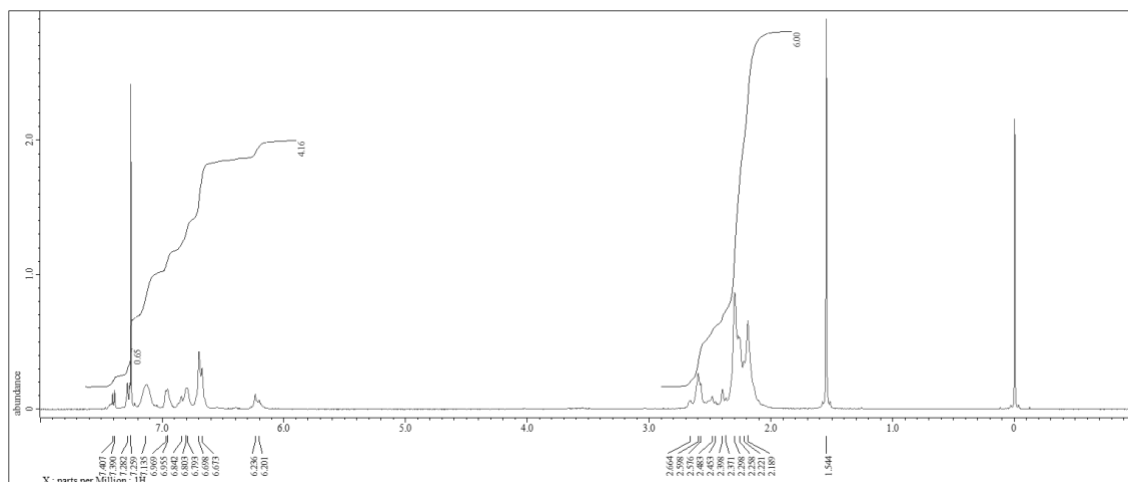

**Fig. S7**  $^1\text{H}$  NMR spectrum of **Cl-PMPS'** (Run 4 in Table 1) in chloroform- $d$ .

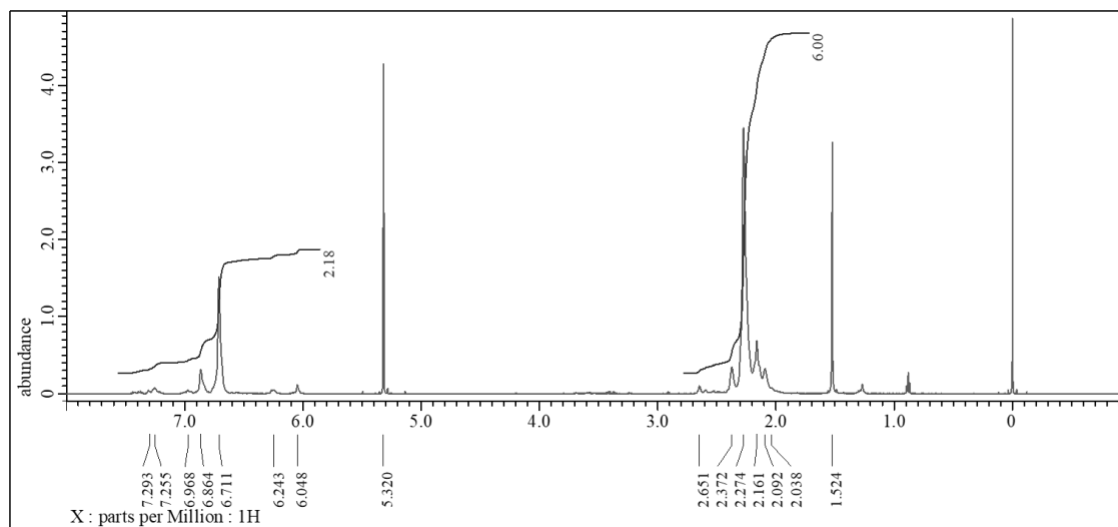

**Fig. S8**  $^1\text{H}$  NMR spectrum of **Br-PMPS** (Run 4 in Table 2) in dichloromethane- $d_2$ .

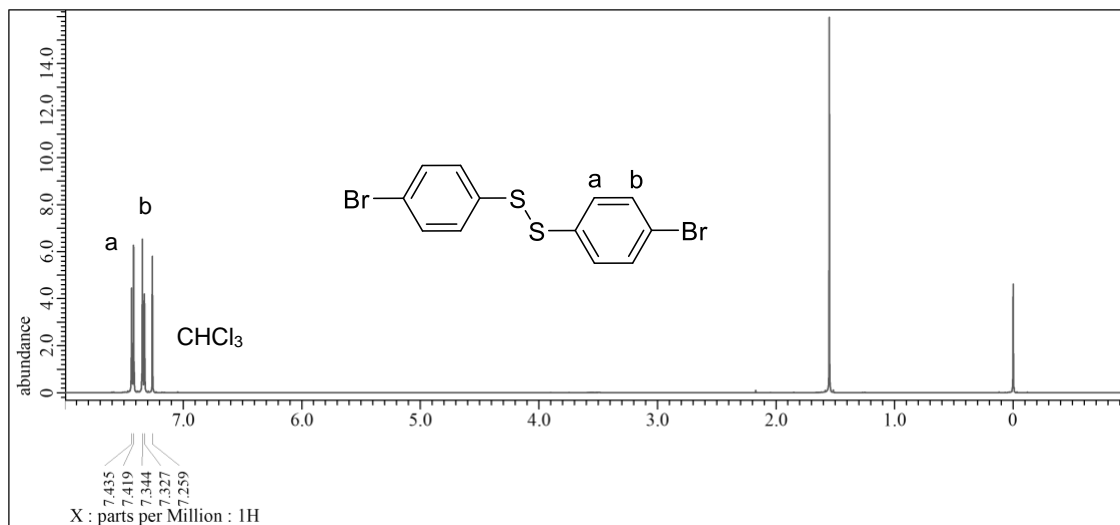

**Fig. S9**  $^1\text{H}$  NMR spectrum of **Br-DPS** in chloroform-*d*.

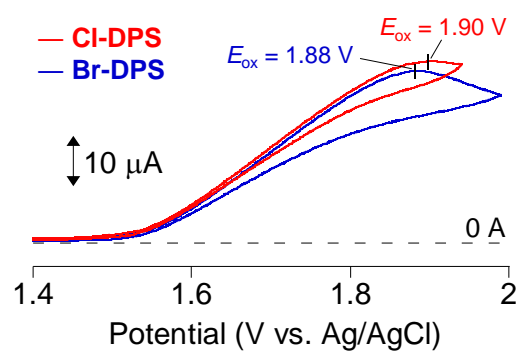

**Fig. S10** Cyclic voltammograms of **Cl-DPS** and **Br-DPS** in 0.1 M TBABF<sub>4</sub> dichloromethane solution (monomer concn.: 10 mM, scan rate: 10 mV s<sup>-1</sup>). *p*-Halogenated **DPS** had higher oxidation potentials compared with **3,5-DPS** (1.65 V).<sup>2</sup>



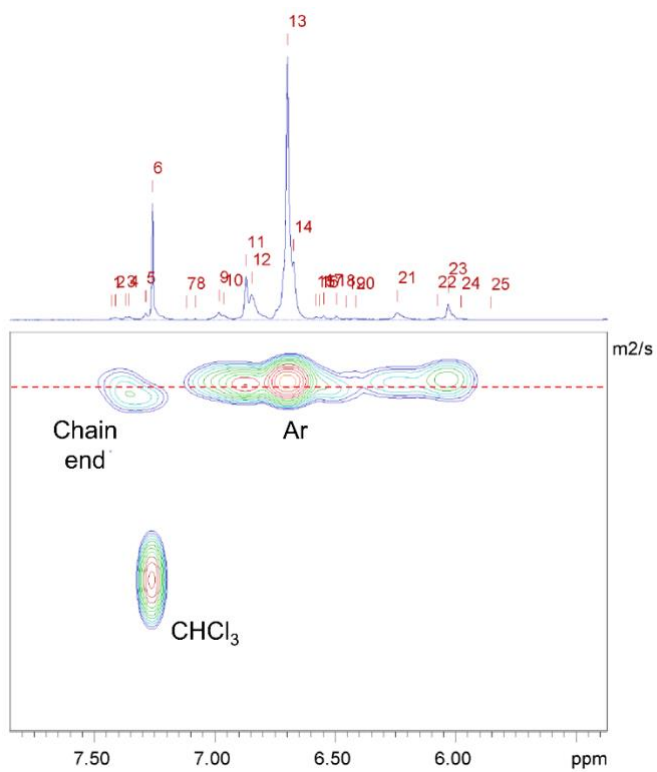

**Fig. S11** DOSY-NMR spectrum of **Br-PMPS** in chloroform-*d*.

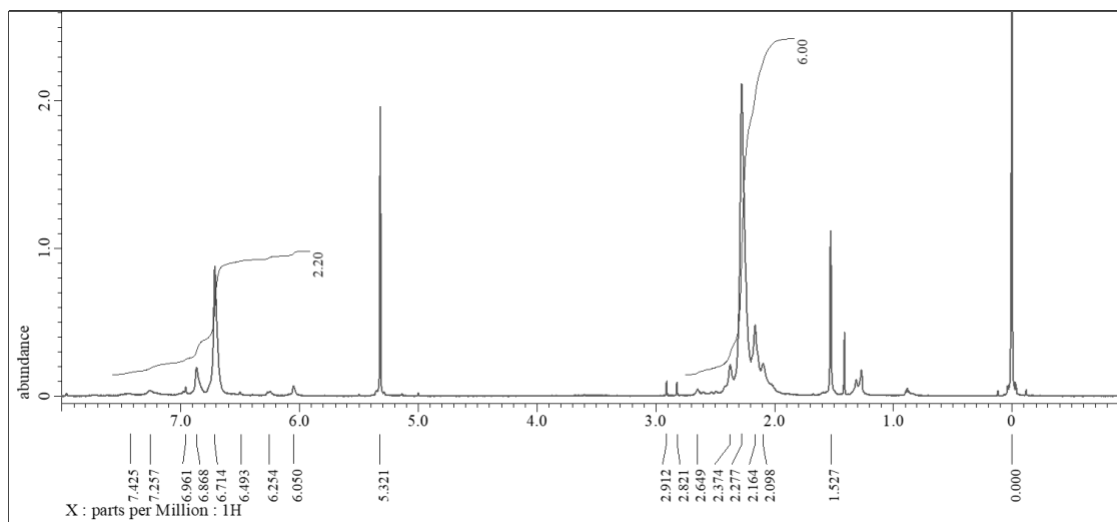

**Fig. S12** <sup>1</sup>H NMR spectrum of **V-PMPS** in dichloromethane-*d*<sub>2</sub>.

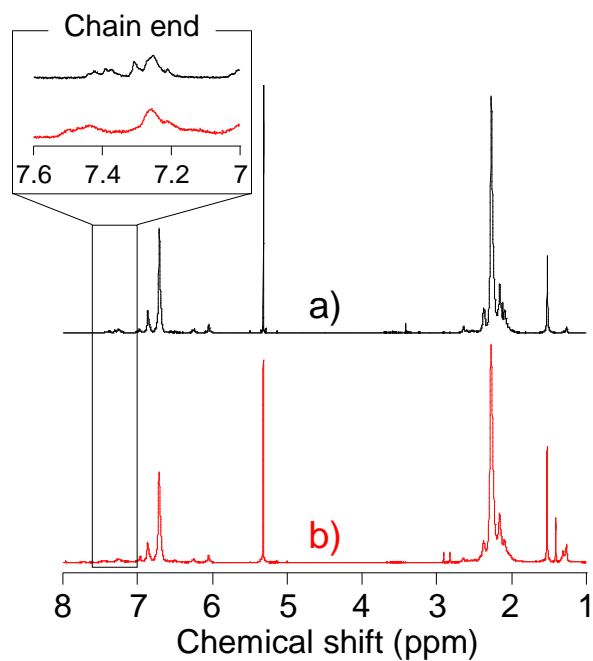

**Fig. S13** <sup>1</sup>H NMR spectra of (a) **Br-PMPS** (Run 3 in Table 2) and (b) **V-PMPS** in dichloromethane-*d*<sub>2</sub>.

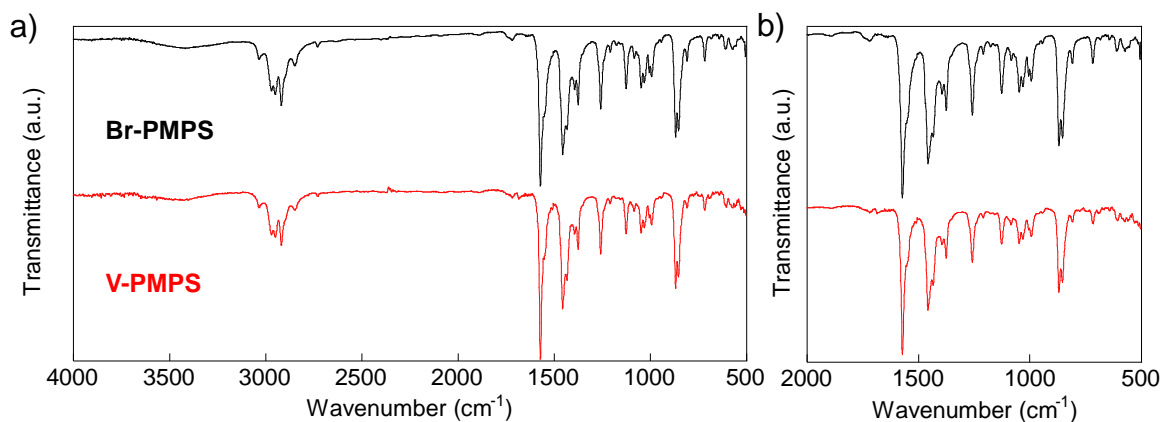

**Fig. S14** IR spectra of **Br-PMPS** (Run 3 in Table 2) and **V-PMPS**: (a) Overall (4000-500 cm<sup>-1</sup>) and (b) expanded (2000-500 cm<sup>-1</sup>) spectra.

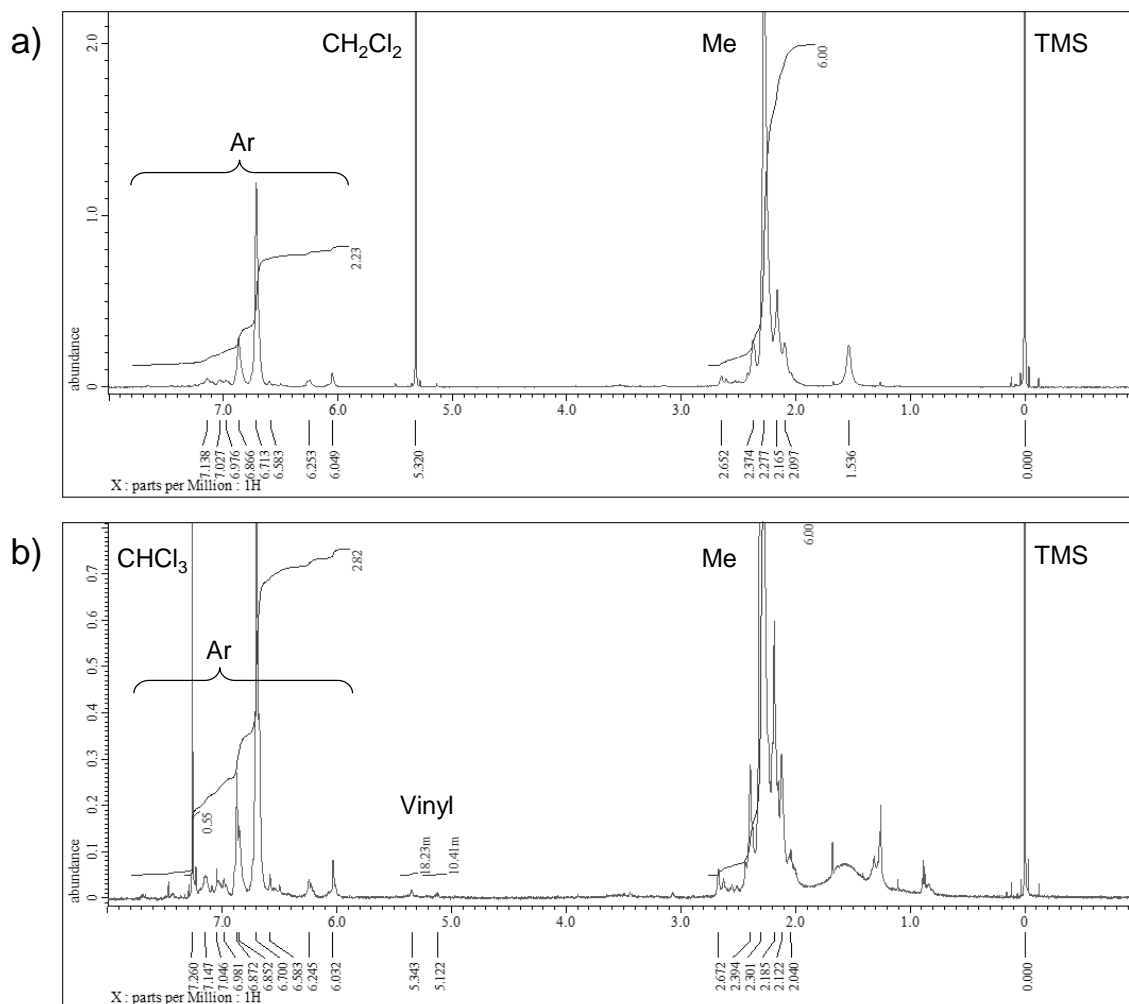

**Fig. S15** <sup>1</sup>H NMR spectrum of V-PMPS' in (a) dichloromethane-*d*<sub>2</sub> and (b) chloroform-*d*.

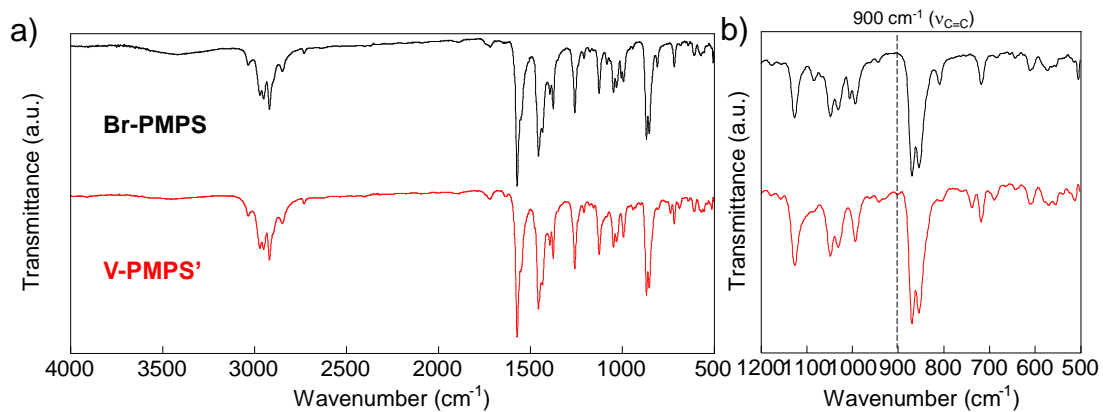

**Fig. S16** IR spectra of **Br-PMPS** (Run 4 in Table 2) and **V-PMPS'**: (a) Overall (4000-500 cm<sup>-1</sup>) and (b) expanded (1200-500 cm<sup>-1</sup>) spectra.

### Supplementary references

- 1 S. Watanabe and K. Oyaizu, *ACS Applied Polymer Materials*, 2021, **3**, 4495–4503.
- 2 K. Yamamoto, N. Iwasaki, H. Nishide and E. Tsuchida, *Eur. Polym. J.*, 1992, **28**, 341–346.
